# Supplementary material for: On the possible catalysis by single water molecules of gas-phase hydrogen abstraction reactions by OH radicals
Source: Royal Society of Chemistry journal article supplement (doi:10.1039/c2cp40795g), 2012-01-01
Supplement: c2cp40795g.pdf [file c2cp40795g.pdf]

Supporting Information for:

## **On the possible catalysis by single water molecules of gas-phase hydrogen abstraction reactions by OH radicals**

**Ditte Linde Thomsen<sup>a</sup>, Theo Kurtén<sup>b</sup>, Solvejg Jørgensen<sup>a</sup>, Timothy J. Wallington<sup>c</sup>, Signe Bang Baggesen<sup>a</sup>, Cecilie Aalling<sup>a</sup>,  
and Henrik G. Kjaergaard<sup>a\*</sup>**

<sup>a</sup> Department of Chemistry, University of Copenhagen, Universitetsparken 5, DK-2100 Copenhagen Ø, Denmark.

<sup>b</sup> Laboratory of Physical Chemistry, Department of Chemistry, P.O. BOX 55, FI-00014 University of Helsinki, Finland

<sup>c</sup> Systems Analytics and Environmental Sciences Department, Ford Motor Company, Mail Drop RIC-2122, Dearborn, Michigan 48121-2053, USA

\*Corresponding author:

Email: hgk @ chem.ku.dk

FAX: 45-35320322

Phone: 45-35320334

|                                 | $\Delta E_{TS}$ |             |         |
|---------------------------------|-----------------|-------------|---------|
|                                 | B3LYP           | CCSD(T)-F12 | CBS-QB3 |
| CH <sub>4</sub>                 | 2.3             | 6.7         | 4.1     |
| CF <sub>3</sub> H               | 0.0             | 4.9         | 3.2     |
| CH <sub>3</sub> OH              | -2.3            | -1.4        | 0.9     |
| CH <sub>3</sub> NH <sub>2</sub> | -2.8            | -0.4        | 1.1     |

Table S1: Electronic energy without ZPVE of the transition state in the absence of water calculated in kcal/mol with respect to isolated reactants. Calculated with B3LYP/aug-cc-pVTZ and CCSD(T)-F12/VDZ-F12a on B3LYP/AVTZ optimized geometries, and with the composite CBS-QB3 method.

|                                                   | $\Delta\Delta G_{TS}$ |       |       |
|---------------------------------------------------|-----------------------|-------|-------|
|                                                   | 298 K                 | 200 K | 100 K |
| CH <sub>4</sub>                                   | -                     | -     | -     |
| CFH <sub>3</sub>                                  | -0.4                  | -0.9  | -2.0  |
| (CH <sub>3</sub> ) <sub>2</sub> CFH               | 0.8                   | -0.1  | -0.9  |
| CF <sub>3</sub> H                                 | -                     | -     | -     |
| CH <sub>3</sub> OH                                | 1.4                   | 0.4   | -0.5  |
| (CH <sub>3</sub> ) <sub>2</sub> CHOH              | -0.9                  | -1.5  | -2.1  |
| F <sub>2</sub> CHOH                               | 2.1                   | 1.3   | 0.5   |
| CH <sub>3</sub> NH <sub>2</sub>                   | 0.8                   | 0.0   | -0.8  |
| (CH <sub>3</sub> ) <sub>2</sub> CHNH <sub>2</sub> | -0.6                  | -1.3  | -1.9  |
| F <sub>2</sub> CHNH <sub>2</sub>                  | -0.9                  | -1.9  | -2.9  |
| CH <sub>3</sub> CHO                               | -2.0                  | -2.7  | -3.2  |

Table S2: Temperature dependence of the change in Gibbs free energy ( $\Delta\Delta G_{TS}$ , in kcal/mol) of the transition state between hydrated and non-hydrated reactions ( $\Delta\Delta G_{TS} = \Delta G_{TS,H_2O} - \Delta G_{TS}$ ). Calculated with respect to the energy of  $RH \cdots H_2O + OH$  for the hydrated reaction and relative to the isolated reactants for the non-hydrated reaction. Calculated with the CCSD(T)-F12a/cc-pVDZ-F12 electronic energies at the B3LYP/aug-cc-pVTZ structures and the B3LYP/aug-cc-pVTZ thermodynamic corrections.

## Tables of Energetics of all reactants, water adducts, reaction complexes and transition states

### Reactants

|                                                    | B3LYP              |                              |                    |                    |        | CCSD(T)-F12              |       |
|----------------------------------------------------|--------------------|------------------------------|--------------------|--------------------|--------|--------------------------|-------|
|                                                    | $E_{\text{B3LYP}}$ | $\text{ZPVE}_{\text{B3LYP}}$ | $H_{\text{B3LYP}}$ | $G_{\text{B3LYP}}$ | $S^2$  | $E_{\text{CCSD(T)-F12}}$ | T1    |
| CH <sub>4</sub>                                    | -40.53842          | 0.04455                      | -40.49007          | -40.51250          | -      | -40.45303                | 0.009 |
| CH <sub>3</sub> F                                  | -139.80443         | 0.03907                      | -139.76150         | -139.78679         | -      | -139.60834               | 0.009 |
| (CH <sub>3</sub> ) <sub>2</sub> CHF                | -218.47458         | 0.09539                      | -218.37316         | -218.40647         | -      | -218.12748               | 0.010 |
| CF <sub>3</sub> H                                  | -338.38137         | 0.02498                      | -338.35197         | -338.38252         | -      | -337.96880               | 0.011 |
| CH <sub>3</sub> OH                                 | -115.77676         | 0.05106                      | -115.72141         | -115.74847         | -      | -115.59412               | 0.009 |
| (CH <sub>3</sub> ) <sub>2</sub> CHOH               | -194.44282         | 0.10735                      | -194.32899         | -194.36296         | -      | -194.11072               | 0.010 |
| CF <sub>2</sub> HOH                                | -314.35508         | 0.03663                      | -314.31340         | -314.34507         | -      | -313.95491               | 0.011 |
| CH <sub>3</sub> NH <sub>2</sub>                    | -95.90341          | 0.06372                      | -95.83529          | -95.86263          | -      | -95.73312                | 0.009 |
| (CH <sub>3</sub> ) <sub>2</sub> CH NH <sub>2</sub> | -174.56612         | 0.12018                      | -174.43940         | -174.47344         | -      | -174.24740               | 0.009 |
| CF <sub>2</sub> HNH <sub>2</sub>                   | -294.48037         | 0.04933                      | -294.42592         | -294.45760         | -      | -294.09107               | 0.011 |
| CH <sub>3</sub> CHO                                | -153.89642         | 0.055201                     | -153.836377        | -153.86616         | -      | -153.64020               | 0.014 |
| OH                                                 | -75.768599         | 0.008418                     | -75.756877         | -75.77711          | 0.7527 | -75.66378                | 0.008 |
| H <sub>2</sub> O                                   | -76.466197         | 0.021236                     | -76.441181         | -76.46260          | -      | -76.36316                | 0.008 |

Table S3: Total electronic energies, zero point vibrational energies, enthalpies and Gibbs Free energies (hartree) of all reactants. All geometries are optimized using B3LYP/aug-cc-pVTZ and the B3LYP values corresponds to this level of theory.  $S^2$  refers to the expectation value of the total spin before projection..  $E_{\text{CCSD(T)-F12}}$  refer to the electronic energy calculated with CCSD(T)-F12a/cc-pVDZ-F12 on the B3LYP/aug-cc-pVTZ geometries

**Water adducts,  $RH \cdots H_2O$**

|                                                    | B3LYP       |                |             |             |        | CCSD(T)-F12       |          |
|----------------------------------------------------|-------------|----------------|-------------|-------------|--------|-------------------|----------|
|                                                    | $E_{B3LYP}$ | $ZPVE_{B3LYP}$ | $H_{B3LYP}$ | $G_{B3LYP}$ | $S^2$  | $E_{CCSD(T)-F12}$ | T1       |
| CH <sub>4</sub>                                    | -           | -              | -           | -           | -      | -                 | -        |
| CH <sub>3</sub> F                                  | -216.27548  | 0.06236        | -216.20617  | -216.24275  | -      | -215.97783        | 0.0091   |
| (CH <sub>3</sub> ) <sub>2</sub> CHF                | -294.94636  | 0.11883        | -294.81757  | -294.86263  | -      | -294.49792        | 0.010    |
| CF <sub>3</sub> H                                  | -           | -              | -           | -           | -      | -                 | -        |
| CH <sub>3</sub> OH                                 | -192.25080  | 0.07524        | -192.16781  | -192.20574  | -      | -191.96629        | 0.009    |
| (CH <sub>3</sub> ) <sub>2</sub> CHOH               | -270.91740  | 0.13155        | -270.77591  | -270.81986  | -      | -270.48392        | 0.009    |
| CF <sub>2</sub> HOH                                | -390.82975  | 0.06010        | -390.76068  | -390.80389  | -      | -390.32858        | 0.010    |
| CH <sub>3</sub> NH <sub>2</sub>                    | -172.38001  | 0.08836        | -172.28405  | -172.32169  | -      | -172.10778        | 0.009    |
| (CH <sub>3</sub> ) <sub>2</sub> CH NH <sub>2</sub> | -251.04229  | 0.14463        | -250.88776  | -250.93160  | -      | -250.62219        | 0.009    |
| CF <sub>2</sub> HNH <sub>2</sub>                   | -370.95304  | 0.07333        | -370.87097  | -370.91373  | -      | -370.46221        | 0.010    |
| OH                                                 | -152.24355  | 0.03290        | -152.20465  | -152.23638  | 0.7526 | -152.03605        | 0.008148 |

Table S4: Total electronic energies, zero point vibrational energies, enthalpies and Gibbs Free energies (hartree) of all water adducts. All geometries are optimized using B3LYP/aug-cc-pVTZ and the B3LYP values corresponds to this level of theory.  $S^2$  refers to the expectation value of the total spin before projection..  $E_{CCSD(T)-F12}$  refer to the electronic energy calculated with CCSD(T)-F12a/cc-pVDZ-F12 on the B3LYP/aug-cc-pVTZ geometries

**Reactions complexes – without water**

|                                                    | B3LYP              |                              |                    |                    |        | CCSD(T)-F12              |       |
|----------------------------------------------------|--------------------|------------------------------|--------------------|--------------------|--------|--------------------------|-------|
|                                                    | $E_{\text{B3LYP}}$ | $\text{ZPVE}_{\text{B3LYP}}$ | $H_{\text{B3LYP}}$ | $G_{\text{B3LYP}}$ | $S^2$  | $E_{\text{CCSD(T)-F12}}$ | T1    |
| CH <sub>4</sub>                                    | -                  | -                            | -                  | -                  | -      | -                        | -     |
| CH <sub>3</sub> F                                  | -215.57850         | 0.049616                     | -215.52198         | -215.55944         | 0.7526 | -215.27835               | 0.009 |
| (CH <sub>3</sub> ) <sub>2</sub> CHF                | -294.24963         | 0.10598                      | -294.13458         | -294.17830         | 0.7526 | -293.79806               | 0.009 |
| CF <sub>3</sub> H                                  | -414.15158         | 0.03456                      | -414.10983         | -414.14989         | 0.7526 | -413.63483               | 0.010 |
| CH <sub>3</sub> OH                                 | -191.55498         | 0.06227                      | -191.48571         | -191.52304         | 0.7527 | -191.26810               | 0.009 |
| (CH <sub>3</sub> ) <sub>2</sub> CHOH               | -270.22160         | 0.11851                      | -270.09385         | -270.13737         | 0.7527 | -269.78530               | 0.009 |
| CF <sub>2</sub> HOH                                | -390.13256         | 0.04748                      | -390.07713         | -390.11901         | 0.7526 | -389.62842               | 0.010 |
| CH <sub>3</sub> NH <sub>2</sub>                    | -171.68502         | 0.07570                      | -171.60273         | -171.63818         | 0.7527 | -171.41017               | 0.009 |
| (CH <sub>3</sub> ) <sub>2</sub> CH NH <sub>2</sub> | -250.34728         | 0.13187                      | -250.20647         | -250.24849         | 0.7527 | -249.92431               | 0.009 |
| CF <sub>2</sub> HNH <sub>2</sub>                   | -370.25650         | 0.06030                      | -370.18817         | -370.22830         | 0.7543 | -369.76009               | 0.016 |

Table S5: Total electronic energies, zero point vibrational energies, enthalpies and Gibbs Free energies (hartree) of all reaction complexes without water. All geometries are optimized using B3LYP/aug-cc-pVTZ and the B3LYP values corresponds to this level of theory.  $S^2$  refers to the expectation value of the total spin before projection..  $E_{\text{CCSD(T)-F12}}$  refer to the electronic energy calculated with CCSD(T)-F12a/cc-pVDZ-F12 on the B3LYP/aug-cc-pVTZ geometries

### Reactions complexes – with water

| X                                                  | Y | B3LYP              |                              |                    |                    | $S^2$  | CCSD(T)-F12              |       |
|----------------------------------------------------|---|--------------------|------------------------------|--------------------|--------------------|--------|--------------------------|-------|
|                                                    |   | $E_{\text{B3LYP}}$ | $\text{ZPVE}_{\text{B3LYP}}$ | $H_{\text{B3LYP}}$ | $G_{\text{B3LYP}}$ |        | $E_{\text{CCSD(T)-F12}}$ | T1    |
| CH <sub>4</sub>                                    |   | -                  | -                            | -                  | -                  | -      | -                        | -     |
| CH <sub>3</sub> F                                  |   | -292.05598         | 0.07460                      | -291.97167         | -292.01606         | 0.7527 | -291.65240               | 0.009 |
| (CH <sub>3</sub> ) <sub>2</sub> CHF                |   | -370.72703         | 0.13076                      | -370.58420         | -370.63514         | 0.7527 | -370.17278               | 0.009 |
| CF <sub>3</sub> H                                  |   | -490.62910         | 0.05942                      | -490.55863         | -490.60882         | 0.7527 | -490.01051               | 0.010 |
| CH <sub>3</sub> OH                                 |   | -268.03171         | 0.08710                      | -267.93473         | -267.97993         | 0.7527 | -267.64318               | 0.009 |
| (CH <sub>3</sub> ) <sub>2</sub> CHOH               |   | -                  | -                            | -                  | -                  | -      | -                        | -     |
| CF <sub>2</sub> HOH                                |   | -                  | -                            | -                  | -                  | -      | -                        | -     |
| CH <sub>3</sub> NH <sub>2</sub>                    |   | -248.16210         | 0.10029                      | -248.05219         | -248.09669         | 0.7527 | -247.78569               | 0.009 |
| (CH <sub>3</sub> ) <sub>2</sub> CH NH <sub>2</sub> |   | -326.82428         | 0.15653                      | -326.65576         | -326.70642         | 0.7527 | -326.29985               | 0.009 |
| CF <sub>2</sub> HNH <sub>2</sub>                   |   | -                  | -                            | -                  | -                  | -      | -                        | -     |

Table S6: Total electronic energies, zero point vibrational energies, enthalpies and Gibbs Free energies (hartree) of all reaction complexes with water. All geometries are optimized using B3LYP/aug-cc-pVTZ and the B3LYP values corresponds to this level of theory.  $S^2$  refers to the expectation value of the total spin before projection..  $E_{\text{CCSD(T)-F12}}$  refer to the electronic energy calculated with CCSD(T)-F12a/cc-pVDZ-F12 on the B3LYP/aug-cc-pVTZ geometries

**Transition state – without water**

|                                                    | B3LYP/AVTZ         |                              |                    |                    |        | CCSD(T)-F12              |       |
|----------------------------------------------------|--------------------|------------------------------|--------------------|--------------------|--------|--------------------------|-------|
|                                                    | $E_{\text{B3LYP}}$ | $\text{ZPVE}_{\text{B3LYP}}$ | $H_{\text{B3LYP}}$ | $G_{\text{B3LYP}}$ | $S^2$  | $E_{\text{CCSD(T)-F12}}$ | T1    |
| CH <sub>4</sub>                                    | -116.30344         | 0.05074                      | -116.24714         | -116.27925         | 0.7571 | -116.10620               | 0.034 |
| CH <sub>3</sub> F                                  | -215.57301         | 0.04590                      | -215.52127         | -215.55525         | 0.7567 | -215.26425               | 0.029 |
| (CH <sub>3</sub> ) <sub>2</sub> CHF                | -294.24683         | 0.10493                      | -294.13358         | -294.17396         | 0.7541 | -293.79337               | 0.013 |
| CF <sub>3</sub> H                                  | -414.14536         | 0.02999                      | -414.10843         | -414.14660         | 0.7568 | -413.61902               | 0.026 |
| CH <sub>3</sub> OH                                 | -191.54897         | 0.06110                      | -191.48158         | -191.51607         | 0.7540 | -191.26006               | 0.014 |
| (CH <sub>3</sub> ) <sub>2</sub> CHOH               | -270.21702         | 0.11767                      | -270.09092         | -270.13107         | 0.7540 | -269.77966               | 0.013 |
| CF <sub>2</sub> HOH                                | -390.12532         | 0.04404                      | -390.07408         | -390.11263         | 0.7562 | -389.61244               | 0.023 |
| CH <sub>3</sub> NH <sub>2</sub>                    | -171.67643         | 0.07336                      | -171.59672         | -171.63117         | 0.7551 | -171.39750               | 0.018 |
| (CH <sub>3</sub> ) <sub>2</sub> CH NH <sub>2</sub> | -250.34057         | 0.13017                      | -250.20190         | -250.24205         | 0.7549 | -249.91467               | 0.015 |
| CF <sub>2</sub> HNH <sub>2</sub>                   | -370.24851         | 0.05569                      | -370.18538         | -370.22411         | 0.7564 | -369.74651               | 0.024 |
| CH <sub>3</sub> CHO                                | -229.67053         | 0.06567                      | -229.59805         | -229.63462         | 0.7536 | -229.30915               | 0.015 |

Table S7: Total electronic energies, zero point vibrational energies, enthalpies and Gibbs Free energies (hartree) of all transition states without water. All geometries are optimized using B3LYP/aug-cc-pVTZ and the B3LYP values corresponds to this level of theory.  $S^2$  refers to the expectation value of the total spin before projection..  $E_{\text{CCSD(T)-F12}}$  refer to the electronic energy calculated with CCSD(T)-F12a/cc-pVDZ-F12 on the B3LYP/aug-cc-pVTZ geometries



**Transition state – with water**

|                                                    | B3LYP/AVTZ         |                              |                    |                    |        | CCSD(T)-F12              |       |
|----------------------------------------------------|--------------------|------------------------------|--------------------|--------------------|--------|--------------------------|-------|
|                                                    | $E_{\text{B3LYP}}$ | $\text{ZPVE}_{\text{B3LYP}}$ | $H_{\text{B3LYP}}$ | $G_{\text{B3LYP}}$ | $S^2$  | $E_{\text{CCSD(T)-F12}}$ | T1    |
| CH <sub>4</sub>                                    | -192.77624         | 0.07445                      | -192.69255         | -192.73692         | 0.7572 | -192.47741               | 0.028 |
| CH <sub>3</sub> F                                  | -292.04790         | 0.06971                      | -291.96945         | -292.01090         | 0.7572 | -291.63853               | 0.026 |
| (CH <sub>3</sub> ) <sub>2</sub> CHF                | -370.72389         | 0.12714                      | -370.58555         | -370.63311         | 0.7566 | -370.16479               | 0.021 |
| CF <sub>3</sub> H                                  | -490.62039         | 0.05366                      | -490.55609         | -490.60547         | 0.7570 | -489.99252               | 0.024 |
| CH <sub>3</sub> OH                                 | -268.02794         | 0.08418                      | -267.93512         | -267.97557         | 0.7565 | -267.63270               | 0.025 |
| (CH <sub>3</sub> ) <sub>2</sub> CHOH               | -346.69761         | 0.14256                      | -346.54392         | -346.59085         | 0.7546 | -346.15740               | 0.014 |
| CF <sub>2</sub> HOH                                | -466.59878         | 0.06642                      | -466.52200         | -466.56816         | 0.7571 | -465.98490               | 0.024 |
| CH <sub>3</sub> NH <sub>2</sub>                    | -248.15662         | 0.09685                      | -248.05116         | -248.09166         | 0.7566 | -247.77302               | 0.025 |
| (CH <sub>3</sub> ) <sub>2</sub> CH NH <sub>2</sub> | -326.82225         | 0.15458                      | -326.65661         | -326.70314         | 0.7558 | -326.29306               | 0.018 |
| CF <sub>2</sub> HNH <sub>2</sub>                   | -446.72544         | 0.08025                      | -446.63520         | -446.67984         | 0.7569 | -446.12365               | 0.023 |
| CH <sub>3</sub> CHO                                | -306.15216         | 0.09094                      | -306.05169         | -306.09538         | 0.7529 | -305.68904               | 0.014 |

Table S8: Total electronic energies, zero point vibrational energies, enthalpies and Gibbs Free energies (hartree) of all transition states with water. All geometries are optimized using B3LYP/aug-cc-pVTZ and the B3LYP values corresponds to this level of theory.  $S^2$  refers to the expectation value of the total spin before projection..  $E_{\text{CCSD(T)-F12}}$  refer to the electronic energy calculated with CCSD(T)-F12a/cc-pVDZ-F12 on the B3LYP/aug-cc-pVTZ geometries

## Optimized geometries

All geometries are optimized on the B3LYP/aug-cc-pVTZ level of theory.

### Reactants

#### CH<sub>4</sub>

C,-0.13626834,-0.031446584,0.  
H,0.2263798818,-1.0572102172,-0.0000008781  
H,0.2263992503,0.4814281313,0.8883335575  
H,0.2263978164,0.4814291453,-0.8883335575  
H,-1.2242503085,-0.0314333954,0.0000008781

#### CH<sub>3</sub>F

C,0.0,0.0,-0.6374804735  
H,0.0000001243,1.0321167902,-0.986484557  
H,-0.8938394222,-0.5160582875,-0.986484557  
H,0.8938392979,-0.5160585027,-0.986484557  
F,0.0,0.0,0.7543741445

#### (CH<sub>3</sub>)<sub>2</sub>CHF

C,0.,0.0348290701,0.3662511024  
H,0.,0.1368866752,1.4544102242  
F,0.,1.356710722,-0.1347691437  
C,1.2726438926,-0.641919088,-0.0977431807  
H,2.146044765,-0.0776739254,0.2270404423  
H,1.3388534654,-1.6479818631,0.3189769317  
H,1.2905493243,-0.7167418571,-1.1856747846  
C,-1.2726438926,-0.641919088,-0.0977431807  
H,-1.3388534654,-1.6479818631,0.3189769317  
H,-2.146044765,-0.0776739254,0.2270404423  
H,-1.2905493243,-0.7167418571,-1.1856747846

#### CF<sub>3</sub>H

C,-0.3987037579,0.5217522264,-0.0220245556  
H,-0.0357486953,1.0350094953,-0.9110291574  
F,0.0373267054,1.1382650956,1.0863870404  
F,0.0373031056,-0.7464296926,-0.0017444955  
F,-1.7397361677,0.5100838153,-0.0017945019

#### CH<sub>3</sub>OH

C,0.6668654019,-0.0202997308,-0.0000002012  
H,1.0817192433,0.9855384458,-0.0000077328  
H,1.0268582312,-0.5438879134,-0.8906375489  
H,1.0268589693,-0.5438751419,0.8906443638

O,-0.7497580594,0.1202824659,-0.0000005066  
H,-1.1496367864,-0.7537911256,0.000000459

(CH<sub>3</sub>)<sub>2</sub>CHOH

C,0.0206460321,0.0579655019,0.3855996568  
H,-0.8608684136,-0.4512081462,-0.0091742762  
C,-0.1061797961,0.1619381313,1.9012497274  
H,-1.0029637933,0.7184668105,2.1715023328  
H,-0.1615433041,-0.827231517,2.3588981291  
H,0.7590772567,0.6774704516,2.3270319202  
C,1.2674784292,-0.7035787471,-0.0497384616  
H,1.2603831485,-1.7229384093,0.3398873148  
H,1.3261762378,-0.7494312368,-1.1366772487  
H,2.1704028912,-0.2116161611,0.3223599328  
O,-0.0337678772,1.3530063611,-0.2271977869  
H,0.7220343889,1.868289971,0.0743140494

CF<sub>2</sub>HOH

C,-0.0076432595,-0.0088324115,0.3333473625  
H,-0.050191407,0.0366114945,1.4238688406  
F,-0.258038473,1.2538017935,-0.1375955403  
F,-0.9875081502,-0.8142247587,-0.1154588456  
O,1.1658812959,-0.4897559501,-0.1693660463  
H,1.8955209939,0.0673948323,0.1241382291

CH<sub>3</sub>NH<sub>2</sub>

C,0.7082279694,0.0001004587,0.0164626701  
H,1.1146324158,0.8783834553,-0.4852397155  
H,1.1150865163,-0.8767261272,-0.4874333878  
H,1.0787602719,-0.0010851667,1.0490639455  
N,-0.7499309198,-0.0000332287,-0.1184379199  
H,-1.1548968444,-0.8131272709,0.3280235889  
H,-1.1551374092,0.8124148794,0.3289858188

(CH<sub>3</sub>)<sub>2</sub>CHNH<sub>2</sub>

C,0.0000450607,0.024246739,0.3612319641  
H,0.000016656,0.0381997592,1.4614285079  
N,0.0008083436,1.3834596203,-0.1992900436  
H,-0.8138919501,1.9027153242,0.1054613977  
H,0.8163024125,1.9016574799,0.1051398266  
C,1.262362253,-0.7002288968,-0.0957111836  
H,2.1599702972,-0.1734119391,0.2351295172  
H,1.3003216416,-1.7105180914,0.3136051085  
H,1.2905523623,-0.7629407516,-1.1846326898  
C,-1.2630448623,-0.6988408075,-0.0957883952  
H,-1.3022266554,-1.7090323318,0.3136566873

H,-2.1600822393,-0.170937252,0.234866061  
H,-1.2911713198,-0.7616468524,-1.1847047582

#### CF<sub>2</sub>HNH<sub>2</sub>

C,-0.0081795659,-0.0070181508,0.3522304461  
H,-0.0880880064,0.0529269597,1.4365772987  
N,1.3164770308,-0.1717133918,-0.0698482405  
H,1.3971440556,-0.1685870949,-1.0791115309  
H,1.9368235826,0.5128638561,0.3382941983  
F,-0.6207291326,1.1332770268,-0.1590768226  
F,-0.7641609642,-1.0461442051,-0.1014443491

#### H<sub>2</sub>O

O,0.0,0.0,0.1164830922  
H,0.0,0.7633767419,-0.4687600461  
H,0.0,-0.7633767419,-0.4687600461

#### OH

O,0.0,0.0,0.1053101775  
H,0.0,0.0,-0.8699981775

#### Water adducts, RH<sup>+</sup>·H<sub>2</sub>O

##### CH<sub>4</sub>

No stationary structure localized

##### CH<sub>3</sub>F

C,1.35812348,-0.4357927152,0.6563029381  
H,0.6028760095,-1.2125835123,0.7547560046  
H,2.0437674164,-0.6649217247,-0.1570469175  
H,1.9004523795,-0.3028395555,1.5903153966  
O,-1.9942334925,-0.2439078476,0.1021943309  
H,-1.2500034055,0.3708521948,0.1164792436  
F,0.7101485192,0.7717401748,0.3532754642  
H,-2.7795806767,0.3037045158,0.0205246494

##### (CH<sub>3</sub>)<sub>2</sub>CHF

C,0.714434,0.001603,-0.301076  
H,0.341248,-0.105282,-1.321057  
O,-2.836287,-0.000178,-0.22553  
H,-2.049028,-0.428845,0.135831  
F,-0.153553,-0.811314,0.492183  
C,2.108507,-0.570627,-0.178269  
H,2.12366,-1.616164,-0.483519

H,2.795831,-0.016386,-0.818902  
H,2.463198,-0.50038,0.850501  
C,0.569685,1.430659,0.170755  
H,1.176969,2.089046,-0.4521  
H,-0.467695,1.75475,0.101773  
H,0.903968,1.52905,1.204275  
H,-3.571628,-0.57235,0.009333

### CF<sub>3</sub>H

No stationary structure localized

### CH<sub>3</sub>OH

C,1.5693889303,-0.4540348752,0.0103864987  
H,1.3191433971,-1.1424123735,-0.7928559472  
H,0.8018636056,1.2428883592,0.6496126489  
O,-2.1423227698,-0.2011465792,0.071907517  
H,-1.2276256163,0.105844534,-0.0391650724  
O,0.6193860718,0.6134020568,-0.0537033699  
H,-2.6122380138,0.1075944771,-0.7070795719  
H,1.5111821716,-0.9880855865,0.9612146556  
H,2.5872022235,-0.0886120127,-0.1420163587

### (CH<sub>3</sub>)<sub>2</sub>CHOH

C,-0.73393,-0.008371,-0.309601  
H,-0.425434,-0.073307,-1.354074  
H,0.03953,-0.815869,1.321511  
O,2.921597,0.041826,-0.131746  
H,2.045154,-0.3445,0.034643  
O,0.237788,-0.824961,0.378548  
C,-0.646887,1.441015,0.148401  
H,0.367687,1.819937,0.032886  
H,-1.320066,2.070621,-0.435371  
H,-0.933882,1.532824,1.199557  
C,-2.128404,-0.600448,-0.160293  
H,-2.852551,-0.038481,-0.7519  
H,-2.142786,-1.638189,-0.491675  
H,-2.453949,-0.566995,0.8829  
H,3.456555,-0.67414,-0.483932

### CF<sub>2</sub>HOH

C,-0.534815594,0.0016688365,-0.1675488719  
H,0.2199993766,0.0114462108,-0.9481900536  
H,-0.5948631033,-0.0474324872,1.7449635836  
O,2.6389683564,0.0030942259,-0.3724403787  
H,2.2674669727,-0.0169799933,0.516891108  
O,0.0761805357,-0.0384306441,1.0489853113

H,3.5935008447,0.0140237488,-0.2609020781  
F,-1.3330860611,1.1040965765,-0.2744273113  
F,-1.3637853278,-1.0708234741,-0.3306433094

CH<sub>3</sub>NH<sub>2</sub>

N,-0.6883440098,0.7048003927,-0.0010188254  
C,-1.4509031073,-0.5521045552,0.0033593301  
H,-1.1646172488,-1.1445606125,-0.8643053891  
H,-0.9076238584,1.2543433304,-0.8229529327  
H,-0.927640842,1.2722105188,0.8029733001  
O,2.0499209375,-0.2591503544,0.0100448057  
H,1.1704105898,0.1723274944,0.0120159131  
H,2.6905896188,0.455407551,0.0492947  
H,-1.1867489398,-1.1251076967,0.8908895225  
H,-2.53705314,-0.4174830686,-0.0118274242

(CH<sub>3</sub>)<sub>2</sub>CHNH<sub>2</sub>

N,-0.2016485734,-0.9161226244,0.4306888639  
C,0.7081242975,-0.0020785038,-0.291861957  
H,0.3877243789,-0.0263190542,-1.3366796529  
H,-0.0599434557,-1.8724727407,0.1244879265  
H,0.0023584965,-0.8967189921,1.4251150354  
O,-2.8424591498,0.0566742625,-0.2723324693  
H,-2.0069255591,-0.3553813503,0.0326016056  
C,0.5077138359,1.4151975205,0.2347448511  
H,1.1209062901,2.1235507889,-0.3225545997  
H,-0.535121582,1.7171946456,0.150327214  
H,0.8003938745,1.4808223036,1.286616896  
C,2.1749646372,-0.4340554757,-0.2261505489  
H,2.3052455403,-1.447104571,-0.6117761084  
H,2.8074730948,0.231251486,-0.8167947758  
H,2.5389492668,-0.415486875,0.8042517956  
H,-3.5495253925,-0.4664118199,0.1135239238

CF<sub>2</sub>HNH<sub>2</sub>

N,-0.1723637907,-0.7527090375,0.4305511525  
C,0.7644730601,0.0101578353,-0.2964111318  
H,0.52242482,0.0487038403,-1.3571438559  
H,-0.2924157844,-1.6742215926,0.0294509126  
H,0.0983116834,-0.8364453018,1.4041891841  
O,-3.0221342313,-0.0217219108,-0.1925263042  
H,-2.1107330278,-0.0942604576,0.1323536452  
H,-3.3259232749,0.8492663092,0.0769001648  
F,0.7970747115,1.2739511017,0.2081552231  
F,2.0576778341,-0.4674387863,-0.1848489903

OH

O,-0.3640798177,1.5141316321,0.2000097466  
H,-0.067480124,0.5885635849,0.049333927  
O,0.4350278602,-1.227695417,-0.1526250723  
H,-0.2239763644,-1.865827304,-0.4429856682  
H,0.9289317758,-1.6584206458,0.5518918568

### Reactions complexes – without water

CH<sub>4</sub>

No stationary structure localized

CH<sub>3</sub>F

C,1.514417,0.39979,-0.000002222  
H,0.99423,1.355037,-0.033988  
H,2.101707,0.313218,0.911804  
H,2.144641,0.272811,-0.877751  
O,-2.247252,0.188039,-0.000075  
H,-1.354058,-0.213207,0.000904  
F,0.55611,-0.625657,-0.000041

(CH<sub>3</sub>)<sub>2</sub>CHF

C,0.6427,-0.000009,-0.279923  
H,0.134121,-0.001426,-1.245586  
O,-3.134917,-0.001163,-0.255421  
H,-2.248476,-0.003775,0.162847  
F,-0.410414,-0.00762,0.688984  
C,1.441606,-1.269486,-0.093857  
H,0.801726,-2.145381,-0.192266  
H,2.223991,-1.330365,-0.851548  
H,1.911592,-1.286538,0.889856  
C,1.426977,1.277996,-0.089866  
H,2.208824,1.350086,-0.847116  
H,0.777133,2.146798,-0.185837  
H,1.896464,1.297476,0.894042

CF<sub>3</sub>H

C,0.758419865,0.0029003696,0.2961435659  
H,0.4222166321,0.00647807,1.3313756727  
F,1.3164644372,1.1746309561,-0.0265519186  
F,1.6506225856,-0.9709820027,0.0890746242  
F,-0.2891893903,-0.2056488447,-0.5319338351  
O,-3.3275636783,0.0084702724,0.188408616  
H,-2.5347914513,-0.0902358206,-0.3721887251

CH<sub>3</sub>OH

C,1.55355,-0.395167,0.016492  
H,1.876266,-0.543557,1.049097  
H,0.764122,1.396242,0.276534  
O,-2.258284,-0.188942,0.013831  
H,-1.312044,0.082963,-0.026699  
O,0.479761,0.545458,-0.068269  
H,2.404505,-0.079954,-0.59057  
H,1.174034,-1.336815,-0.37181

(CH<sub>3</sub>)<sub>2</sub>CHOH

C,-0.663103,-0.001882,-0.289279  
H,-0.258613,-0.031936,-1.301906  
H,0.20999,-0.326158,1.462455  
O,3.172295,-0.026618,-0.234682  
H,2.236462,-0.146431,0.051293  
O,0.47232,-0.337956,0.535778  
C,-1.153012,1.406923,0.014627  
H,-0.341489,2.126546,-0.086417  
H,-1.954183,1.692792,-0.668286  
H,-1.545794,1.469441,1.032938  
C,-1.752429,-1.055915,-0.151179  
H,-2.575104,-0.853601,-0.838369  
H,-1.35703,-2.047305,-0.368701  
H,-2.159894,-1.06151,0.863208

CF<sub>2</sub>HOH

C,-0.681428,0.001763,-0.280386  
H,-0.299599,0.016554,-1.297975  
H,0.022242,-0.150828,1.498691  
O,3.216515,0.011707,-0.227704  
H,2.298001,-0.04487,0.10676  
O,0.35776,-0.135256,0.591335  
F,-1.571731,-1.017653,-0.137357  
F,-1.375633,1.146204,-0.033111

CH<sub>3</sub>NH<sub>2</sub>

N,0.538292,0.652061,-0.000088  
C,1.450553,-0.501336,-0.000121  
H,2.51085,-0.231582,-0.000869  
H,1.252555,-1.112512,0.879264  
H,1.251513,-1.113326,-0.878708  
H,0.697972,1.234957,0.812817  
H,0.697878,1.234942,-0.813024  
O,-2.203454,-0.208467,0.000271



H,-1.254495,0.098845,-0.000312

(CH<sub>3</sub>)<sub>2</sub>CHNH<sub>2</sub>

N,-0.339469,-0.834157,0.370937  
C,0.671885,0.000156,-0.312645  
H,0.414428,-0.027736,-1.374755  
H,-0.251781,-1.804052,0.086758  
H,-0.185939,-0.815785,1.37479  
O,-3.032245,-0.012528,-0.195526  
H,-2.102197,-0.308636,0.01336  
C,0.537228,1.439292,0.173446  
H,1.231713,2.091998,-0.35535  
H,-0.474447,1.81051,0.014911  
H,0.7647,1.509515,1.240746  
C,2.098597,-0.527837,-0.147585  
H,2.182039,-1.556264,-0.50398  
H,2.809742,0.078908,-0.710891  
H,2.399724,-0.508802,0.902764

CF<sub>2</sub>HNH<sub>2</sub>

N,-0.386427,-0.64369,0.592511  
C,0.523285,0.007553,-0.258606  
H,0.1511,0.059954,-1.278442  
H,-0.727176,-1.520627,0.229877  
H,-0.06073,-0.72114,1.547863  
O,-2.489802,0.00161,-0.340574  
H,-2.535591,0.72229,0.308399  
F,0.754429,1.26414,0.213257  
F,1.762916,-0.60779,-0.288706

**Reactions complexes – with water**

CH<sub>4</sub>

No stationary structure localized

CH<sub>3</sub>F

C,1.710358,-0.751132,0.064966  
H,2.220258,-0.888498,1.015939  
H,0.751802,-1.265446,0.056916  
H,2.338692,-1.078912,-0.760183  
O,-1.861605,-1.41831,-0.050552  
H,-1.799197,-0.434539,0.02153  
O,-1.277795,1.317147,0.126124  
H,-1.601786,2.015584,-0.449311

H,-0.315118,1.297838,0.020438  
F,1.473155,0.630008,-0.099967

(CH<sub>3</sub>)<sub>2</sub>CHF

C,-1.0331521125,0.1680637436,0.0371515829  
H,-0.2007144213,0.8691744014,0.1046550062  
O,2.3504694082,1.7168475742,0.0967812709  
H,2.4886662566,0.7383728364,0.0626142409  
O,2.3673261161,-1.0790545239,-0.0282436372  
H,2.8535390555,-1.6202802244,-0.6561771166  
H,1.4261920938,-1.2641537503,-0.174522909  
F,-0.4266196394,-1.0898163862,-0.3131500025  
C,-1.6977826846,-0.011421336,1.3819821858  
H,-0.9743740431,-0.3345566407,2.1293680167  
H,-2.1253166051,0.9367510471,1.7106449576  
H,-2.4980489775,-0.7498433723,1.3228398829  
C,-1.9670182068,0.5445787282,-1.0889265768  
H,-2.4055861736,1.5236100888,-0.8915698669  
H,-1.4288095698,0.5981868712,-2.0343274407  
H,-2.7739044966,-0.1830360572,-1.1831235941

CF<sub>3</sub>H

C,1.072619,0.11275,0.016663  
H,0.456531,1.009123,0.078398  
O,-1.617642,1.755686,0.050252  
H,-2.237197,0.987903,0.032641  
O,-2.796979,-0.795636,-0.089  
H,-3.241879,-1.223319,0.649298  
H,-1.979328,-1.288735,-0.223619  
F,0.301658,-0.962675,-0.283012  
F,2.00374,0.226157,-0.936254  
F,1.681617,-0.134802,1.182965

CH<sub>3</sub>OH

C,-1.6567157578,-0.8770096635,0.2231996928  
H,-0.9098699539,-1.4996781911,-0.2714432153  
H,-1.7954885955,0.5515632257,-1.1289557682  
O,2.173533479,-1.1787424542,-0.142278919  
H,1.8908520569,-0.2344759167,-0.0591293398  
O,1.065253825,1.3786299751,0.0582428152  
H,1.2059687247,2.0206981349,0.7588959107  
H,0.10663299,1.1883667353,0.033426992  
O,-1.5594182895,0.4927922791,-0.1985190767  
H,-1.4692572574,-0.8858919818,1.2938290053  
H,-2.6569322214,-1.2713841428,0.037491903

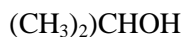

No stationary structure localized

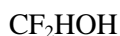

No stationary structure localized

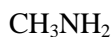

N,-1.5557686877,0.4676740459,-0.2799590402  
C,-1.6088644439,-0.9048276861,0.2541728527  
H,-2.5051056264,-1.4578347737,-0.040429424  
H,-0.7309711618,-1.4518975188,-0.085197647  
H,-1.5727447047,-0.8644840305,1.3419094943  
H,-1.6131773318,0.4551052326,-1.2918115776  
H,-2.3465747856,1.0105544763,0.0457380525  
O,2.1856498205,-1.1700911492,-0.1251309963  
H,1.8904150612,-0.2268889527,-0.0470247127  
O,1.076945711,1.3665037992,0.0828842355  
H,1.2125048414,1.9406864188,0.8409639792  
H,0.1079673078,1.1688561381,0.0334257837

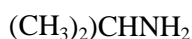

N,-0.5565896489,1.1993376702,-0.275443764  
C,-1.0704923764,-0.1814020297,-0.113381258  
H,-0.3549548371,-0.8297364907,-0.623952486  
H,-0.618286793,1.4843081986,-1.2475766473  
H,-1.136017429,1.8482990488,0.2485313102  
O,2.6124899665,-1.5674264914,-0.3935238125  
H,2.5682438376,-0.5905550182,-0.2301765809  
O,2.2235092336,1.1389082474,0.0722842548  
H,2.5461111258,1.5941052628,0.8541554729  
H,1.2405027918,1.2623096176,0.0444792802  
C,-1.0656559528,-0.5400005737,1.3685297737  
H,-1.3876851505,-1.5705549823,1.5158704531  
H,-0.0688408528,-0.4326519829,1.7946657032  
H,-1.7501726893,0.1052349521,1.9266266372  
C,-2.4498320854,-0.3804408956,-0.7427775173  
H,-2.438530641,-0.1261245936,-1.8041340493  
H,-2.773661618,-1.4186233341,-0.6537597701  
H,-3.1969368811,0.2480153947,-0.2512819999

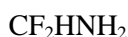

No stationary structure localized

**Transition states – without water**

CH<sub>4</sub>

C,0.6293767827,0.6027737294,-0.0163602243  
H,-0.5233065309,0.269296974,-0.1927526575  
H,0.6841844935,1.017313303,0.9851478809  
H,0.8030115768,1.3445416988,-0.7905767244  
O,-1.7733372025,-0.1708971822,-0.2907584591  
H,-1.774873359,-0.7980487142,0.4500358521  
H,1.2342571094,-0.2893563087,-0.1432130277

CH<sub>3</sub>F

C,-0.5938712444,0.6185707034,0.0001036771  
H,0.5594081999,0.3564104224,0.0004198311  
H,-0.7844831181,1.1793432252,-0.9134541952  
H,-0.7847768308,1.1798285981,0.9133053654  
O,1.8874352922,-0.0774044761,0.0005411772  
H,1.7165244772,-1.0342059643,-0.000879357  
F,-1.3141337761,-0.5471355087,0.0002935015

(CH<sub>3</sub>)<sub>2</sub>CHF

C,0.332572,-0.000014,-0.068579  
H,-0.657496,-0.000233,-0.573716  
O,-2.452472,-0.000155,-0.457755  
H,-2.396262,-0.000546,0.515372  
F,0.035863,-0.000382,1.313369  
C,1.068508,1.278032,-0.398494  
H,1.251132,1.339242,-1.471671  
H,0.483037,2.145859,-0.098902  
H,2.02849,1.305644,0.119722  
C,1.069319,-1.277467,-0.398991  
H,0.484398,-2.145786,-0.099748  
H,1.252002,-1.338136,-1.472189  
H,2.029308,-1.304673,0.119233

CF<sub>3</sub>H

C,0.2791613971,-0.0148752603,0.0000006803  
H,-0.9404206935,-0.1653738219,0.0009302856  
F,0.5678437276,1.2876565113,-0.0026645824  
O,-2.2314528483,-0.1914425913,0.001629324  
H,-2.4401661733,0.7577769923,-0.000587601  
F,0.7849778977,-0.5881489908,-1.0872093606  
F,0.7860986927,-0.5839498393,1.0888932541

CH<sub>3</sub>OH

C,0.784993,0.697843,0.002045  
H,0.997973,1.156714,-0.960589

H,-0.298771,0.82474,0.211816  
H,1.340783,1.216912,0.787051  
O,-1.936173,-0.025192,0.041352  
H,-1.444951,-0.741096,-0.402212  
O,1.132626,-0.672525,-0.095336  
H,1.123387,-1.062588,0.783532

(CH<sub>3</sub>)<sub>2</sub>CHOH

C,0.0000804823,-0.2568119712,0.0043578607  
H,-0.0368608377,-0.5168061586,1.0870325149  
C,1.4514208792,-0.043060654,-0.3807700768  
H,2.0350776043,-0.9409109052,-0.1783826382  
H,1.5292441745,0.194132683,-1.4431402799  
H,1.8801322684,0.780569777,0.1884413909  
C,-0.6804798322,-1.3728152992,-0.772891208  
H,-0.1734969866,-2.3230462332,-0.6037282013  
H,-1.7197921034,-1.4932354676,-0.4598713798  
H,-0.661774112,-1.1555632504,-1.8426548986  
O,-0.3699353448,0.3733073262,2.7143250941  
H,-0.4927205054,1.1235541814,2.1016409643  
O,-0.6742111767,0.9969670151,-0.168750835  
H,-1.6240748274,0.8409721489,-0.1816405639

CF<sub>2</sub>HOH

C,-0.3220064943,-0.0319240926,-0.1116335104  
H,0.8233562742,-0.0673498408,-0.345978192  
O,2.245611309,0.1226176416,-0.3988135799  
H,2.5166450184,-0.4932927125,0.303561957  
O,-0.8495823145,1.1728777133,-0.421956219  
H,-0.2814699627,1.8738458572,-0.0789699311  
F,-0.9534940297,-0.9724127063,-0.8205350322  
F,-0.4605098004,-0.3354768598,1.2096735076

CH<sub>3</sub>NH<sub>2</sub>

N,-1.1504071354,-0.6041864763,-0.0319654656  
C,-0.6272242505,0.7453987324,0.0120320613  
H,-0.9925135689,1.3545617075,0.8446427412  
H,0.4903200965,0.7159686712,0.1253100489  
H,-0.8245745373,1.2583663808,-0.9268875267  
H,-1.3509163034,-0.9799849358,0.8835131351  
H,-1.9717790729,-0.6944798856,-0.611255329  
O,1.9211120968,-0.1726719412,-0.0155632418  
H,1.3424586751,-0.9114942529,-0.2785654234

(CH<sub>3</sub>)<sub>2</sub>CHNH<sub>2</sub>

N,-0.068623,-0.228099,1.342683

C,0.308382,-0.011397,-0.05292  
H,-0.640776,-0.099202,-0.649846  
H,-0.065232,-1.209198,1.590339  
H,0.542301,0.261993,1.983579  
O,-2.360237,-0.086703,-0.523944  
H,-2.156539,0.00013,0.427427  
C,0.81318,1.411316,-0.241566  
H,0.983763,1.624804,-1.295944  
H,0.090707,2.132724,0.139141  
H,1.759663,1.556339,0.287892  
C,1.26543,-1.063935,-0.611309  
H,0.862279,-2.06873,-0.475722  
H,1.433386,-0.913697,-1.678538  
H,2.230758,-1.010755,-0.100789

#### CF<sub>2</sub>HNH<sub>2</sub>

N,-0.6815072044,1.3213009352,-0.0014070471  
C,-0.2863812076,-0.0126362505,0.0094806966  
H,0.8927414001,-0.0860722517,-0.0436783144  
H,-0.3101664981,1.830516897,-0.7900627212  
H,-1.6834305068,1.4400556396,0.0873475544  
O,2.2837249424,0.0014065344,-0.0799667482  
H,2.4378206764,0.3269989292,0.8231599585  
F,-0.7234768974,-0.6291906731,1.1291970469  
F,-0.7269697045,-0.7730637601,-1.0486904256

#### Transition states – with water

##### CH<sub>4</sub>

C,2.0727059417,-0.6469752898,0.0010448063  
H,2.6134074976,-0.7247655153,0.939368095  
H,1.2363873763,0.2264876743,0.1922948394  
H,1.5344193274,-1.5542466767,-0.2535162809  
O,0.2448255784,1.0563961234,0.3632339834  
H,-0.501706908,0.4604885493,0.1568565734  
O,-2.1648722137,-0.5464987301,-0.2148762326  
H,-2.7553474932,-0.5507701658,0.5451792519  
H,-2.6694860528,-0.1478601183,-0.9309870967  
H,2.6844019463,-0.2745088509,-0.8149729391

##### CH<sub>3</sub>F

C,-1.5523498252,0.0860408006,0.087570165  
H,-1.9736426777,0.1420104778,1.0881838441  
H,-0.7041783885,0.965605223,0.0105963612

H,-2.2584177795,0.2732822267,-0.7181088314  
O,0.3051140435,1.7854316894,-0.0506051168  
H,1.0258497327,1.1258347371,0.0253025068  
O,1.9613589179,-0.6081418521,0.1254866853  
H,2.5881442712,-0.8640096082,-0.5576577124  
H,1.1854196938,-1.1667987989,-0.0065901174  
F,-0.9423579881,-1.1378678953,-0.0978967844

(CH<sub>3</sub>)<sub>2</sub>CHF

C,-0.8356534112,-0.049633797,0.0385774823  
H,-0.0571917818,0.8267377801,0.1451980482  
O,0.9579928918,1.8055980784,0.2632446751  
H,1.7170082574,1.1904163293,0.1793278279  
O,2.7256861436,-0.4846110476,-0.0837412148  
H,3.3052872016,-0.5888320842,-0.8438814829  
H,1.9398191231,-1.0136339872,-0.276169334  
F,-0.0780072744,-1.176877087,-0.3520170433  
C,-1.4351037774,-0.3096588739,1.3944915058  
H,-0.6610823064,-0.5740471053,2.112859703  
H,-1.9432312748,0.5857180039,1.7510488449  
H,-2.1598745667,-1.1253307287,1.338861797  
C,-1.7818168512,0.3111521481,-1.0750086499  
H,-2.3094557127,1.2316816591,-0.8273103707  
H,-1.2387560751,0.4660909283,-2.0056466221  
H,-2.5160715857,-0.4845132162,-1.2218251666

CF<sub>3</sub>H

C,0.9492079724,-0.0460645973,-0.0006060757  
H,0.0368338309,0.8083476849,-0.0049040154  
O,-0.9576171119,1.5668359595,-0.0134821724  
H,-1.6935347203,0.9185032145,-0.0039428828  
O,-3.0872524468,-0.3626928283,0.0086784469  
H,-3.3088845195,-0.8756678537,0.7918262488  
H,-3.2503083418,-0.9403674405,-0.7432253875  
F,0.7522567284,-0.9265878012,-0.984099618  
F,2.1125332262,0.5736659461,-0.1839890529  
F,0.9636523826,-0.6876702841,1.1684325089

CH<sub>3</sub>OH

C,1.4346252317,0.1236945068,0.3268521058  
H,0.6610547096,0.9849919052,0.1105813474  
H,1.1229964466,-1.0638348985,-1.1892184408  
O,-0.4377196524,1.8425626079,-0.1675925813  
H,-1.1280599699,1.1538443788,-0.0764496778  
O,-1.8444787374,-0.7300253393,0.0319740383  
H,-2.3269734951,-1.1236669378,0.7641355725

H,-0.9623305812,-1.1346738649,0.0366028163  
O,1.0015098882,-1.0931246038,-0.2344436258  
H,1.4811453923,0.0059811933,1.4058219397  
H,2.3843667676,0.4699120522,-0.0837594943

$(\text{CH}_3)_2\text{CHOH}$

C,0.836809,-0.009429,0.018584  
H,0.109936,0.838824,0.11076  
H,0.208399,-0.834869,-1.658964  
O,-1.24683,1.889652,0.191338  
H,-1.886282,1.144357,0.128679  
O,-2.534524,-0.645433,-0.171026  
H,-2.969952,-1.19953,0.482263  
H,-1.650956,-1.030583,-0.318524  
O,0.195716,-1.063905,-0.723244  
C,1.125235,-0.544068,1.40657  
H,1.529979,0.246962,2.036763  
H,0.214517,-0.916448,1.874241  
H,1.84838,-1.360258,1.357764  
C,2.064173,0.509105,-0.710287  
H,1.802529,0.884857,-1.701563  
H,2.513412,1.333308,-0.156573  
H,2.807838,-0.282786,-0.820596

$\text{CF}_2\text{HOH}$

C,0.8395452349,-0.0291191297,0.0025939853  
H,0.0160200537,0.9211458945,-0.0038991336  
H,0.7694422837,-1.9418718254,-0.1219581146  
O,-0.9245776716,1.7326350146,-0.0161953951  
H,-1.6890391088,1.1186391604,-0.0602859564  
O,-2.7483306727,-0.4982793767,-0.0851422214  
H,-3.3202008995,-0.6858172705,0.6652019869  
H,-1.9966406569,-1.099131966,-0.0039079799  
O,0.1539558144,-1.1999030234,-0.0212140726  
F,1.6068191726,0.0910456098,1.1065948444  
F,1.6505274502,0.1039119124,-1.066759943

$\text{CH}_3\text{NH}_2$

N,1.130568254,-0.9876762781,-0.129773301  
C,1.4431735797,0.3934499658,0.1554268328  
H,2.1817468937,0.8442447782,-0.5100227076  
H,0.4913401661,1.0729575256,0.0109649791  
H,1.7285482565,0.5238079183,1.1960134217  
H,1.2815416373,-1.2329750164,-1.0984774492  
H,1.634150945,-1.6394441071,0.4556520475  
O,-0.7355870036,1.7749063973,-0.1413802428



H,-1.3105249816,0.9823388402,-0.0983385495  
O,-1.7600969935,-0.951531197,0.0027306514  
H,-2.1494518572,-1.2933354114,0.8122824558  
H,-0.8026568963,-1.1531164154,0.0505728619

(CH<sub>3</sub>)<sub>2</sub>CHNH<sub>2</sub>

N,0.106699,-1.168743,-0.633124  
C,0.813286,-0.054019,0.002026  
H,0.069869,0.814481,0.055719  
H,0.107986,-1.079465,-1.64254  
H,0.534057,-2.058855,-0.402353  
O,-1.058027,1.877568,0.109437  
H,-1.781388,1.213463,0.069611  
O,-2.623609,-0.525694,-0.130682  
H,-3.045153,-0.96033,0.615473  
H,-1.743458,-0.950092,-0.242262  
C,1.17219,-0.409934,1.434381  
H,1.585832,0.454155,1.951627  
H,0.294632,-0.746603,1.985898  
H,1.921757,-1.207458,1.458014  
C,1.994365,0.474119,-0.805645  
H,1.684617,0.75054,-1.814425  
H,2.420195,1.360495,-0.335157  
H,2.778208,-0.285116,-0.882343

CF<sub>2</sub>HNH<sub>2</sub>

N,0.231534,-1.011703,-0.823751  
C,0.802109,-0.03762,0.016305  
H,0.075012,0.955355,0.0455  
H,0.098291,-0.649421,-1.759689  
H,0.791649,-1.858275,-0.851985  
O,-0.871086,1.825491,-0.050341  
H,-1.640745,1.222497,0.030606  
O,-2.595219,-0.50638,-0.001591  
H,-2.97536,-0.881767,0.797923  
H,-1.782229,-1.007437,-0.178363  
F,0.939722,-0.52593,1.265268  
F,2.030326,0.411908,-0.376391
